# Supplementary material
Source: Royal Society of Chemistry journal article supplement (doi:10.1039/d5ta10187e)
Supplement: d5ta10187e1.pdf [file d5ta10187e1.pdf]

## *Supporting Information*

### **Selection of single-atom for surface charge modulation to promote CO<sub>2</sub> activation and stabilize \*COOH intermediate for solar fuels**

*Chih-Yang Huang<sup>a, b,c</sup>, Ying-Ren Lai<sup>c,d</sup>, Yi-Fan Huang<sup>e</sup>, Tsai-Yu Lin<sup>a,b,c</sup>, Kongpop Limwatcharagul<sup>a,b,c</sup>, Mengstu Etay Ashebir<sup>c,f,g,h,i</sup>, Heng-Liang Wu<sup>c,d,j</sup>, Michitoshi Hayashi<sup>c,d\*</sup>, Mohammad Qorbani<sup>k,l\*</sup>, Kuei-Hsien Chen<sup>c,i\*</sup> and Li-Chyong Chen<sup>c,d,m\*</sup>*

<sup>a</sup>International Graduate Program of Molecular Science and Technology, National Taiwan University (NTU-MST), Taipei 10617, Taiwan

<sup>b</sup>Molecular Science and Technology Program, Taiwan International Graduate Program (TIGP), Academia Sinica, Taipei 11529, Taiwan

<sup>c</sup>Center for Condensed Matter Sciences, National Taiwan University, Taipei 10617, Taiwan

<sup>d</sup>Center of Atomic Initiative for New Materials, National Taiwan University, Taipei, 10617, Taiwan

<sup>e</sup>Department of Mechanical Engineering, National Chin-Yi University of Technology, Taichung 411030, Taiwan

<sup>f</sup>Sustainable Chemical Science and Technology, Taiwan International Graduate Program, Academia Sinica, Nankang, Taipei 11529, Taiwan

<sup>g</sup>Institute of Chemistry, Academia Sinica, Nankang, Taipei 11529, Taiwan

<sup>h</sup>Department of Applied Chemistry, National Yang Ming Chiao Tung University, Hsinchu, 30010, Taiwan

<sup>i</sup>Institute of Atomic and Molecular Sciences, Academia Sinica, Taipei 10617, Taiwan

<sup>j</sup>Department of Chemistry, National Taiwan University, Taipei 10617, Taiwan

<sup>k</sup>Undergraduate Program of Electro-Optical Engineering, National Taiwan Normal University, Taipei 11677, Taiwan

<sup>l</sup>Institute of Electro-Optical Engineering, National Taiwan Normal University, Taipei 11677, Taiwan

<sup>m</sup>Department of Physics, National Taiwan University, Taipei 10617, Taiwan

E-mail: atmyh@ntu.edu.tw; qorbani@ntnu.edu.tw; chenhk@pub.iams.sinica.edu.tw; chenlc@ntu.edu.tw

\* Author to whom correspondence should be addressed.

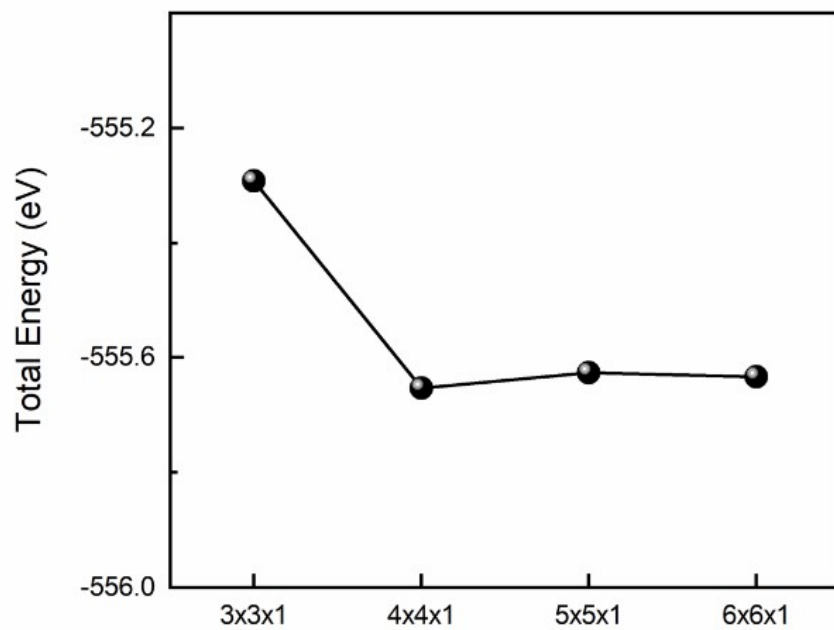

**Fig. S1. k-point convergence test.** Total energy versus k-point.

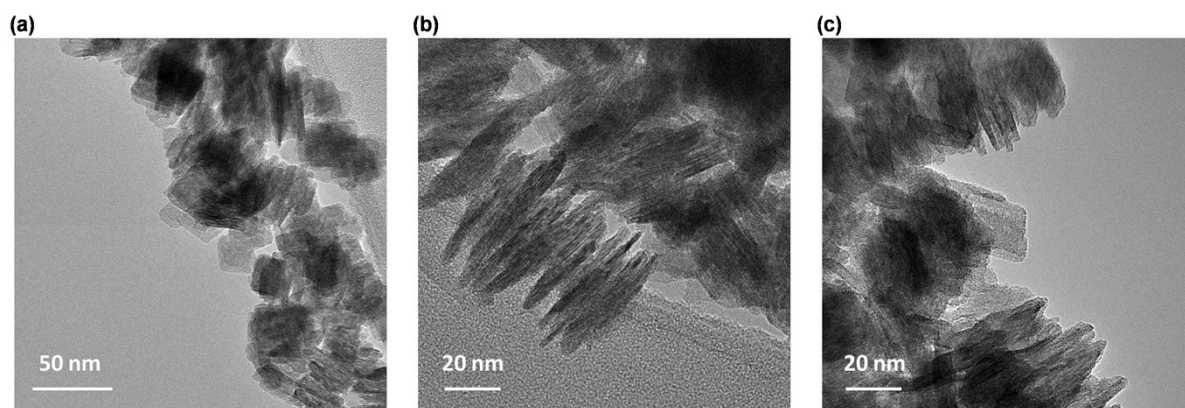

**Fig. S2. Microstructure.** STEM images of (a)  $\text{WO}_3$ , (b)  $\text{SA-Cr-WO}_3$  and (c)  $\text{SA-Ni-WO}_3$

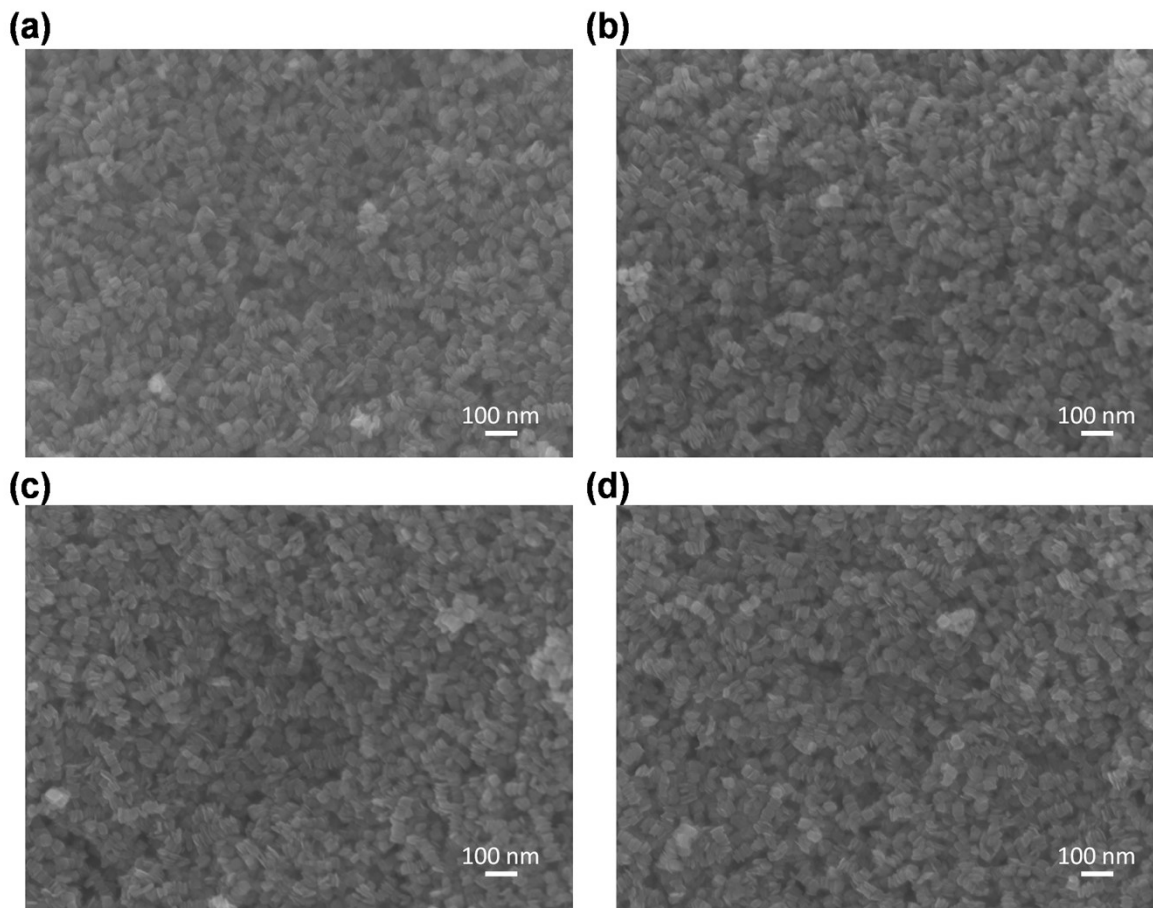

**Fig. S3. Morphology.** SEM images of (a)  $\text{WO}_3$ , (b) SA-Cr- $\text{WO}_3$ , (c) SA-Fe- $\text{WO}_3$  and (d) SA-Ni- $\text{WO}_3$ .

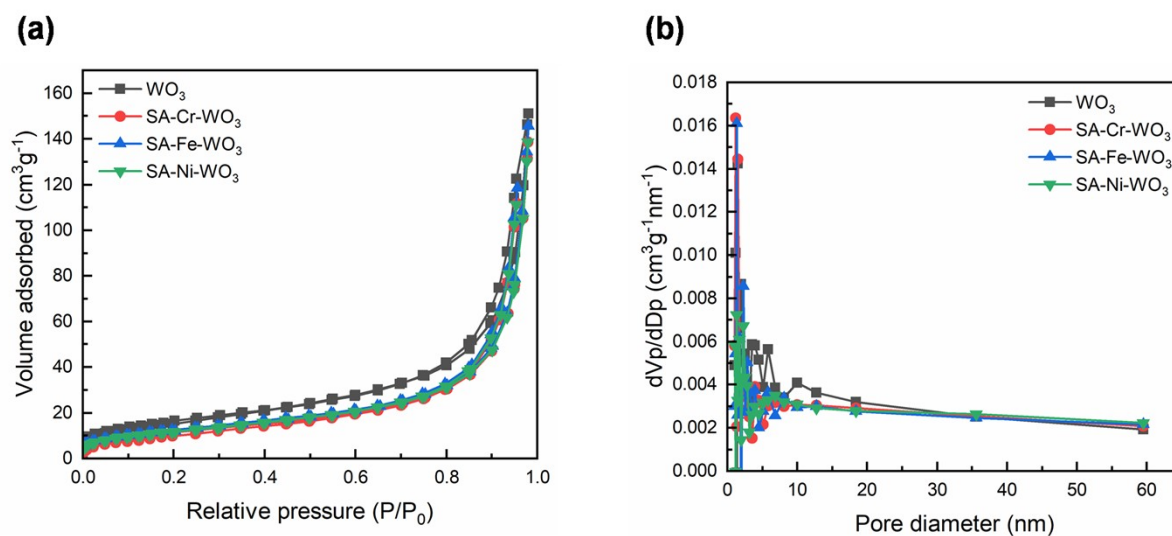

**Fig. S4. Surface area analysis of the photocatalyst.** (a) Nitrogen adsorption–desorption isotherms and (b) pore size distribution of  $\text{WO}_3$ , SA-Cr- $\text{WO}_3$ , SA-Fe- $\text{WO}_3$ , and SA-Ni- $\text{WO}_3$ .

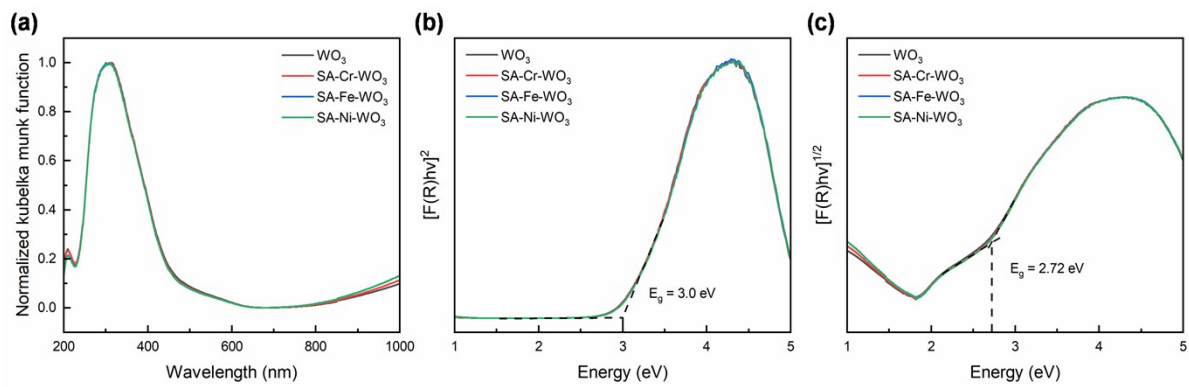

**Fig. S5. Optical absorption of photocatalyst.** (a) diffuse reflectance spectroscopy spectra. (b, c) Indirect and direct bandgap estimations, respectively.

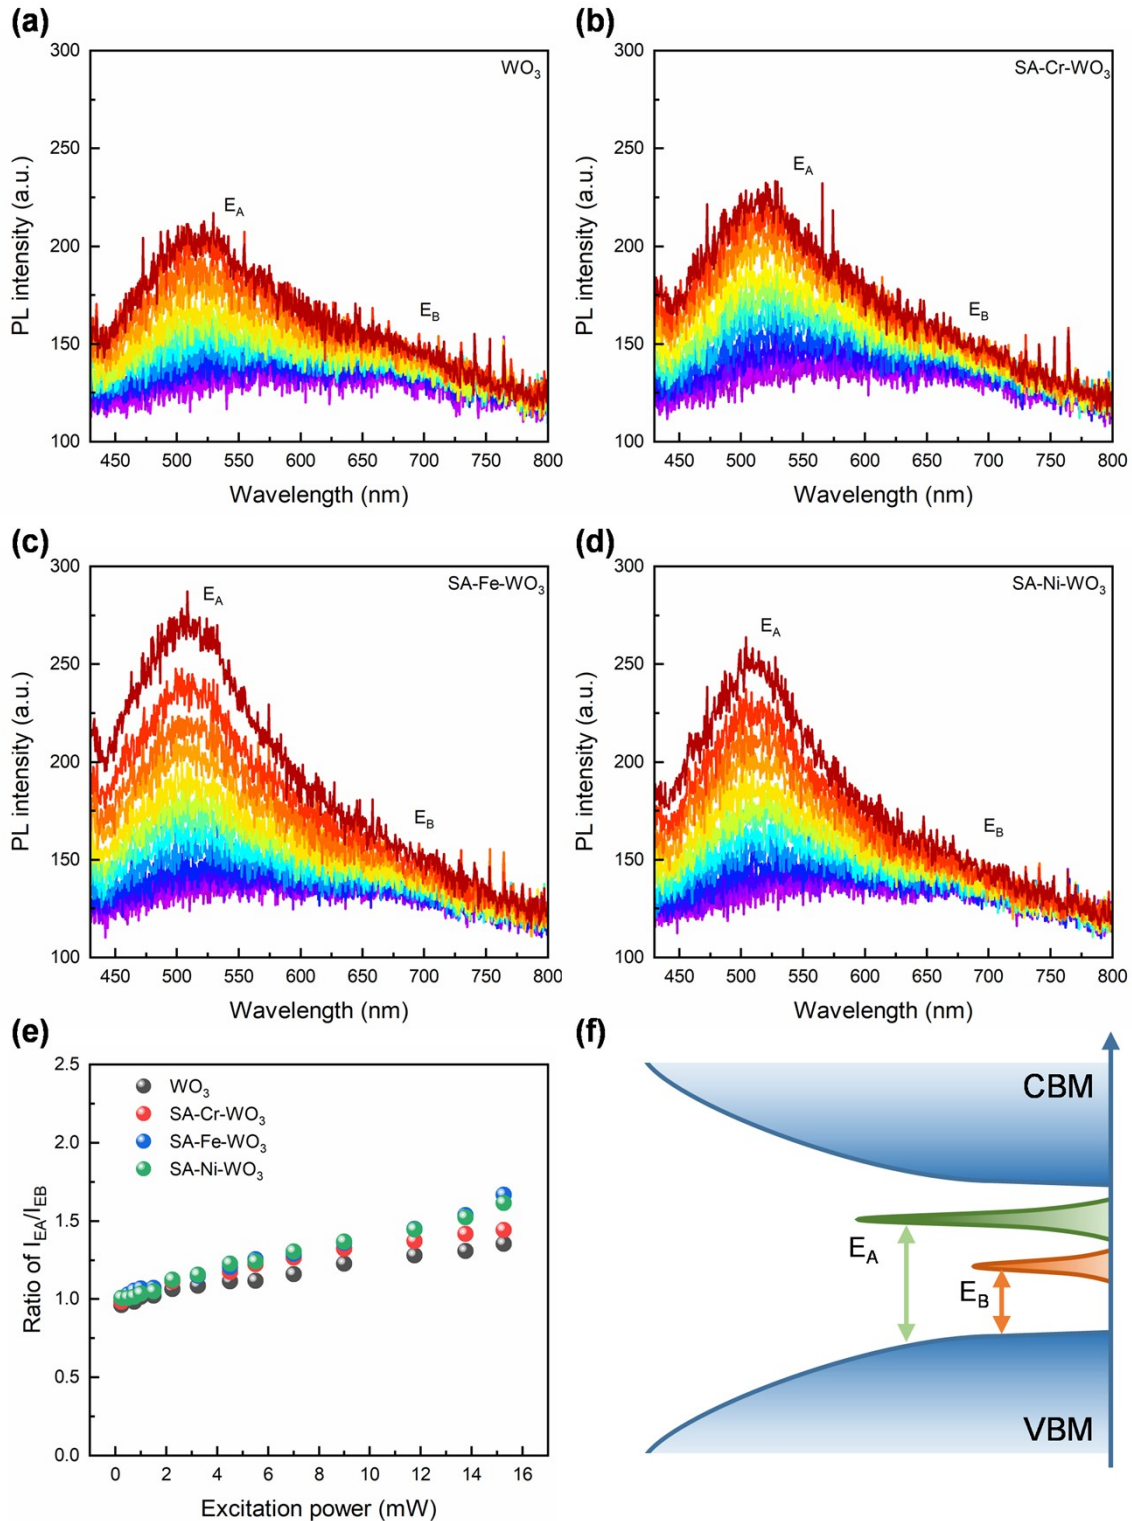

**Fig. S6. Power-dependent photoluminescence analysis of  $\text{WO}_3$  and transition metal-anchored  $\text{WO}_3$ .** Photoluminescence spectra of (a)  $\text{WO}_3$ , (b) SA-Cr- $\text{WO}_3$ , (c) SA-Fe- $\text{WO}_3$ , and (d) SA-Ni- $\text{WO}_3$  under excitation powers ranging from 0.25 to 15.25 mW. (e) Intensity ratio of emission peaks  $E_A$  and  $E_B$  as a function of excitation power. (f) Schematic illustration of photoluminescence emission in  $\text{WO}_3$ .

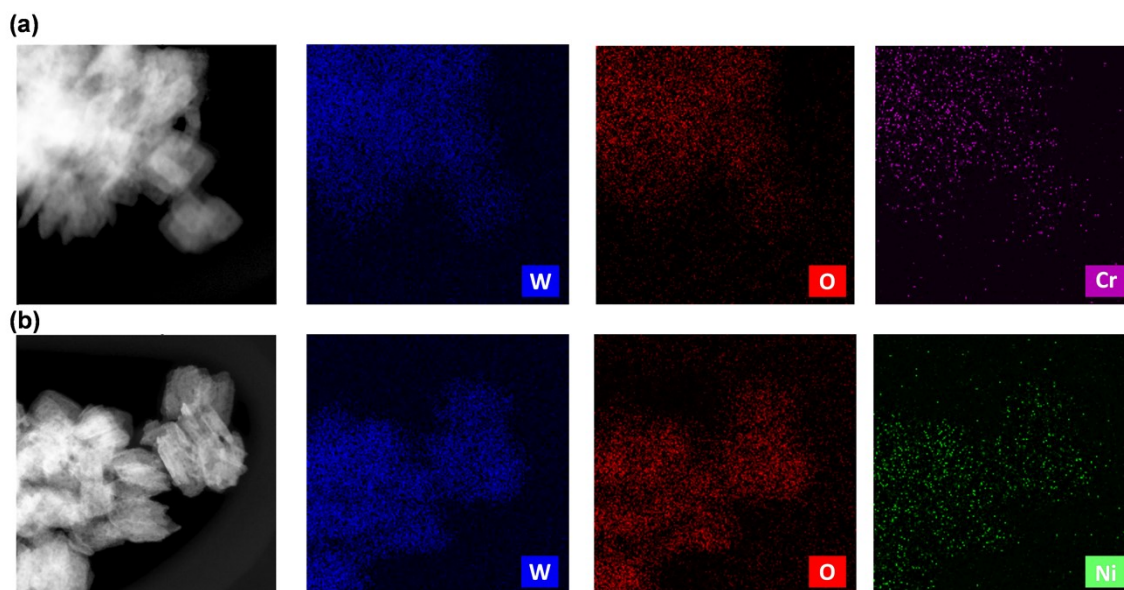

**Fig. S7. Distribution of elements.** EDS elemental mapping images of (a, b) SA-Cr-WO<sub>3</sub> and SA-Ni-WO<sub>3</sub>, respectively.

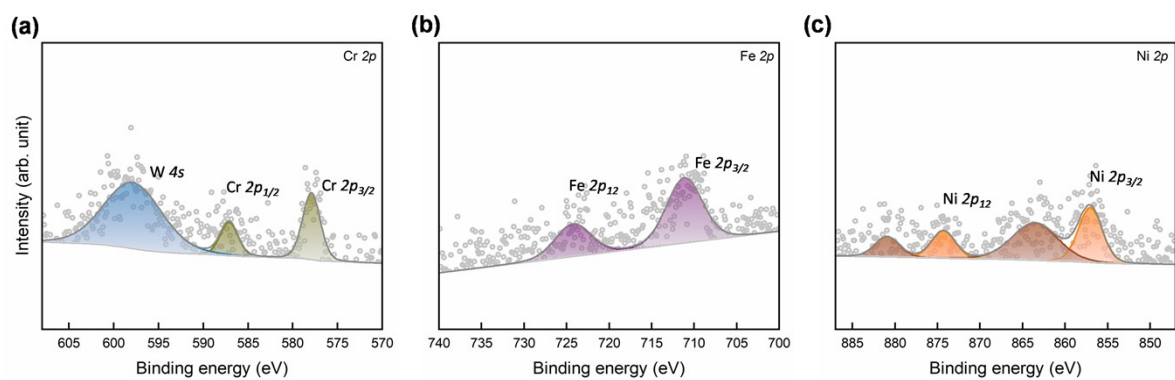

**Fig. S8. XPS of transition metal-anchored WO<sub>3</sub>.** XPS of (a) SA-Cr-WO<sub>3</sub>, (b) SA-Fe-WO<sub>3</sub> and (c) SA-Ni-WO<sub>3</sub>

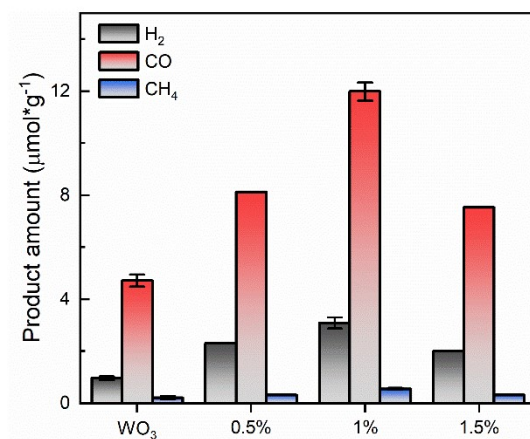

**Fig. S9. Optimization of the Fe loading amount for photocatalytic CO<sub>2</sub> reduction.** Photocatalytic CO<sub>2</sub> reduction performance of SA-Fe-WO<sub>3</sub> with various Fe loading concentrations (0–1.5%) for an irradiation time of 4 h.

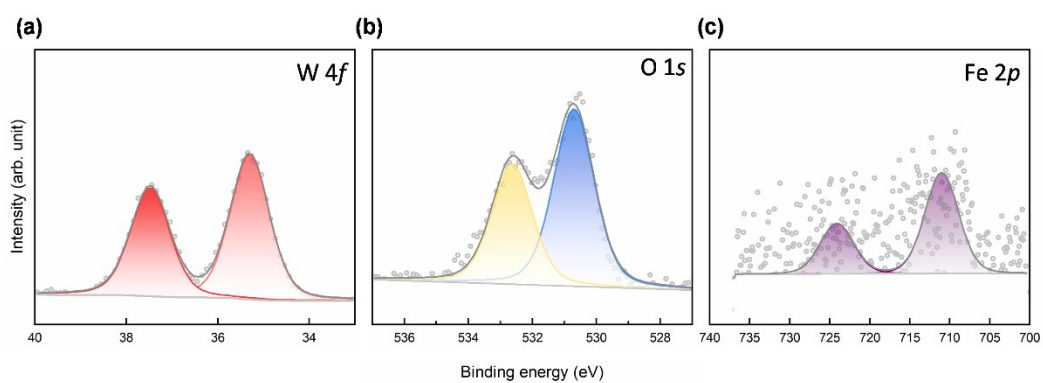

**Fig. S10. XPS analysis at high Fe loading.** High-resolution XPS spectra of (a) W 4*f*, (b) O 1*s*, and (c) Fe 2*p* for the 1.5% Fe-WO<sub>3</sub> sample.

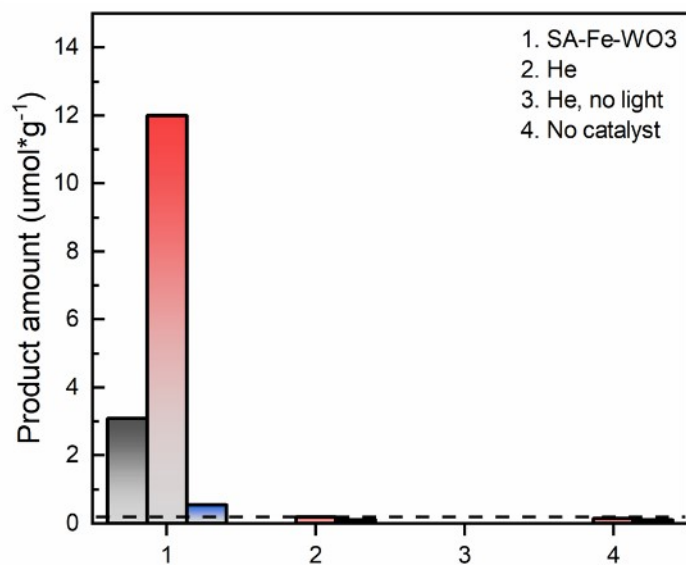

**Fig. S11. Blank tests.** Blank tests of PC-CO<sub>2</sub>RR for SA-Fe-WO<sub>3</sub>.

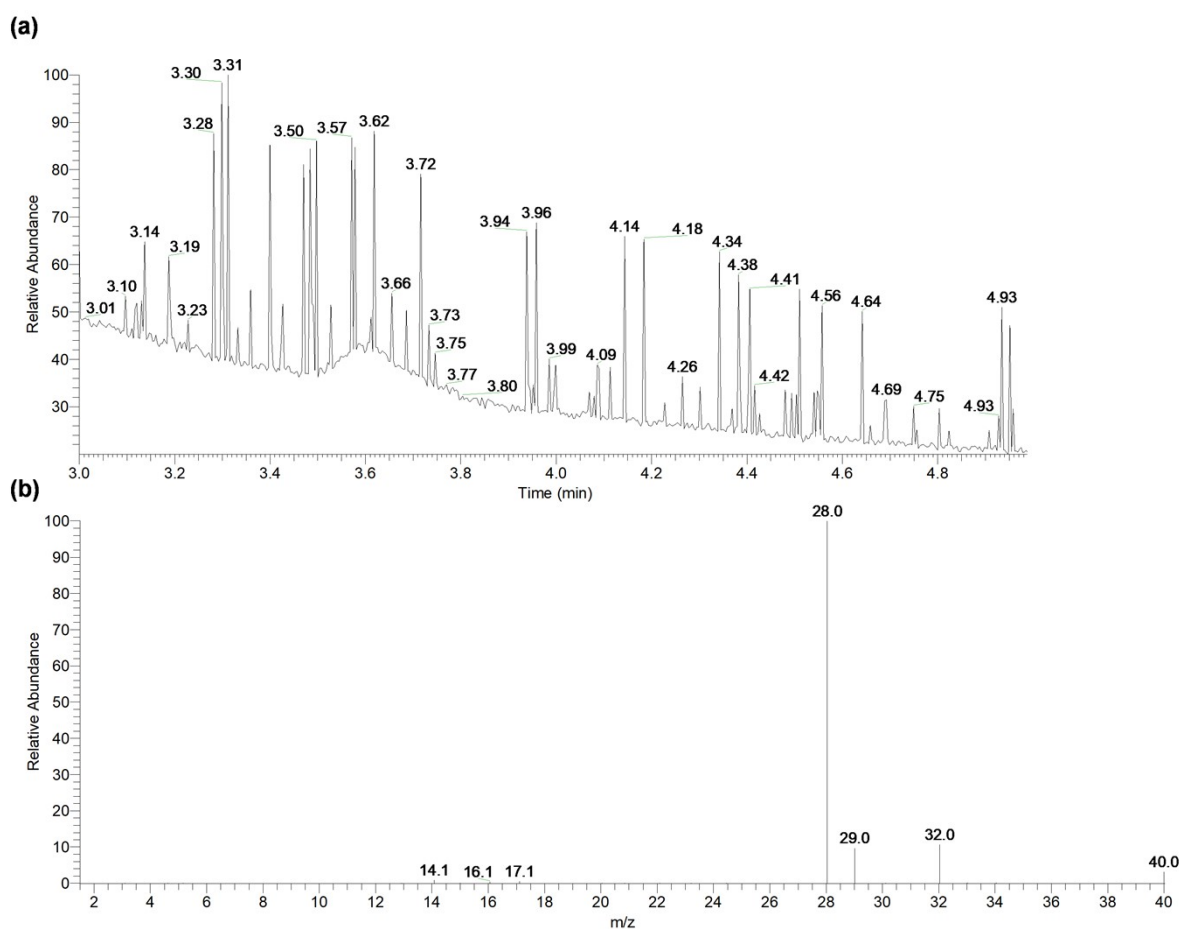

**Fig. S12. Isotope tracing analysis of CO<sub>2</sub> photoreduction over SA-Fe-WO<sub>3</sub>.** (a) Total ion chromatography and (b) mass spectrum of <sup>13</sup>C isotope tracing measurement.

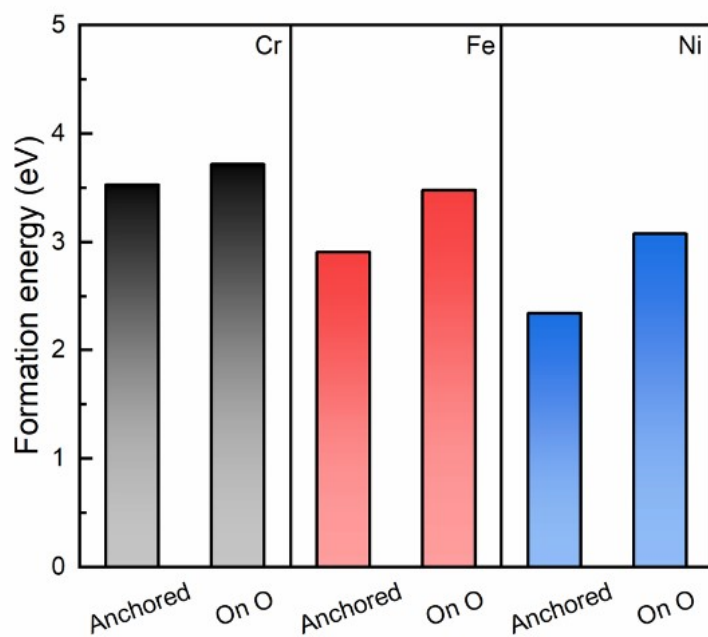

**Fig. S13. Formation energy of anchored metals.** Calculated formation energy for two possible anchoring configurations for Cr, Fe, and Ni anchored atoms.

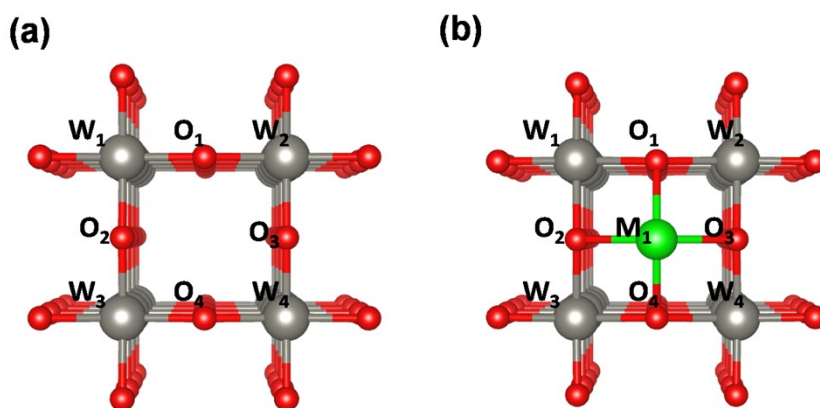

**Fig. S14. Schematic illustration of the simulation model.** (a, b) WO<sub>3</sub> structure and SA-M-WO<sub>3</sub> structure, respectively. Red: oxygen atom. Grey: tungsten atom. Green: anchored transition metal.

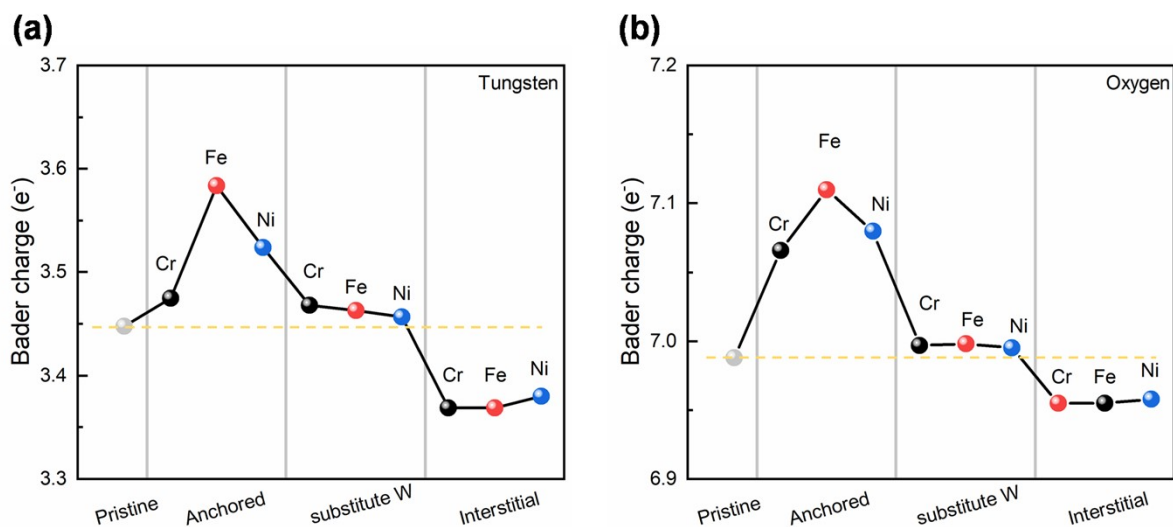

**Fig. S15. Bader charge analysis of surface W and O atoms with dopants positioned at various sites. (a, b) Bader charge on tungsten and oxygen atoms, respectively.**

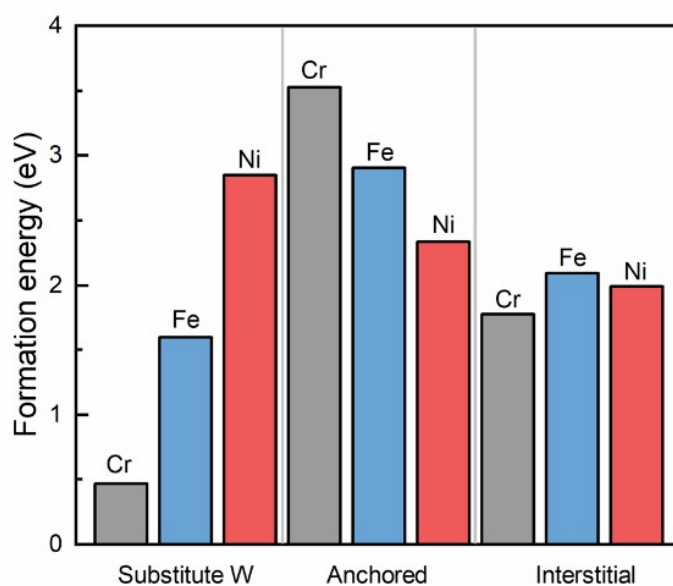

**Fig. S16. Formation energy of metals at different positions on WO<sub>3</sub>. Calculated formation energy of metals at various positions within the WO<sub>3</sub> lattice, including surface anchoring, substitutional, and interstitial sites**

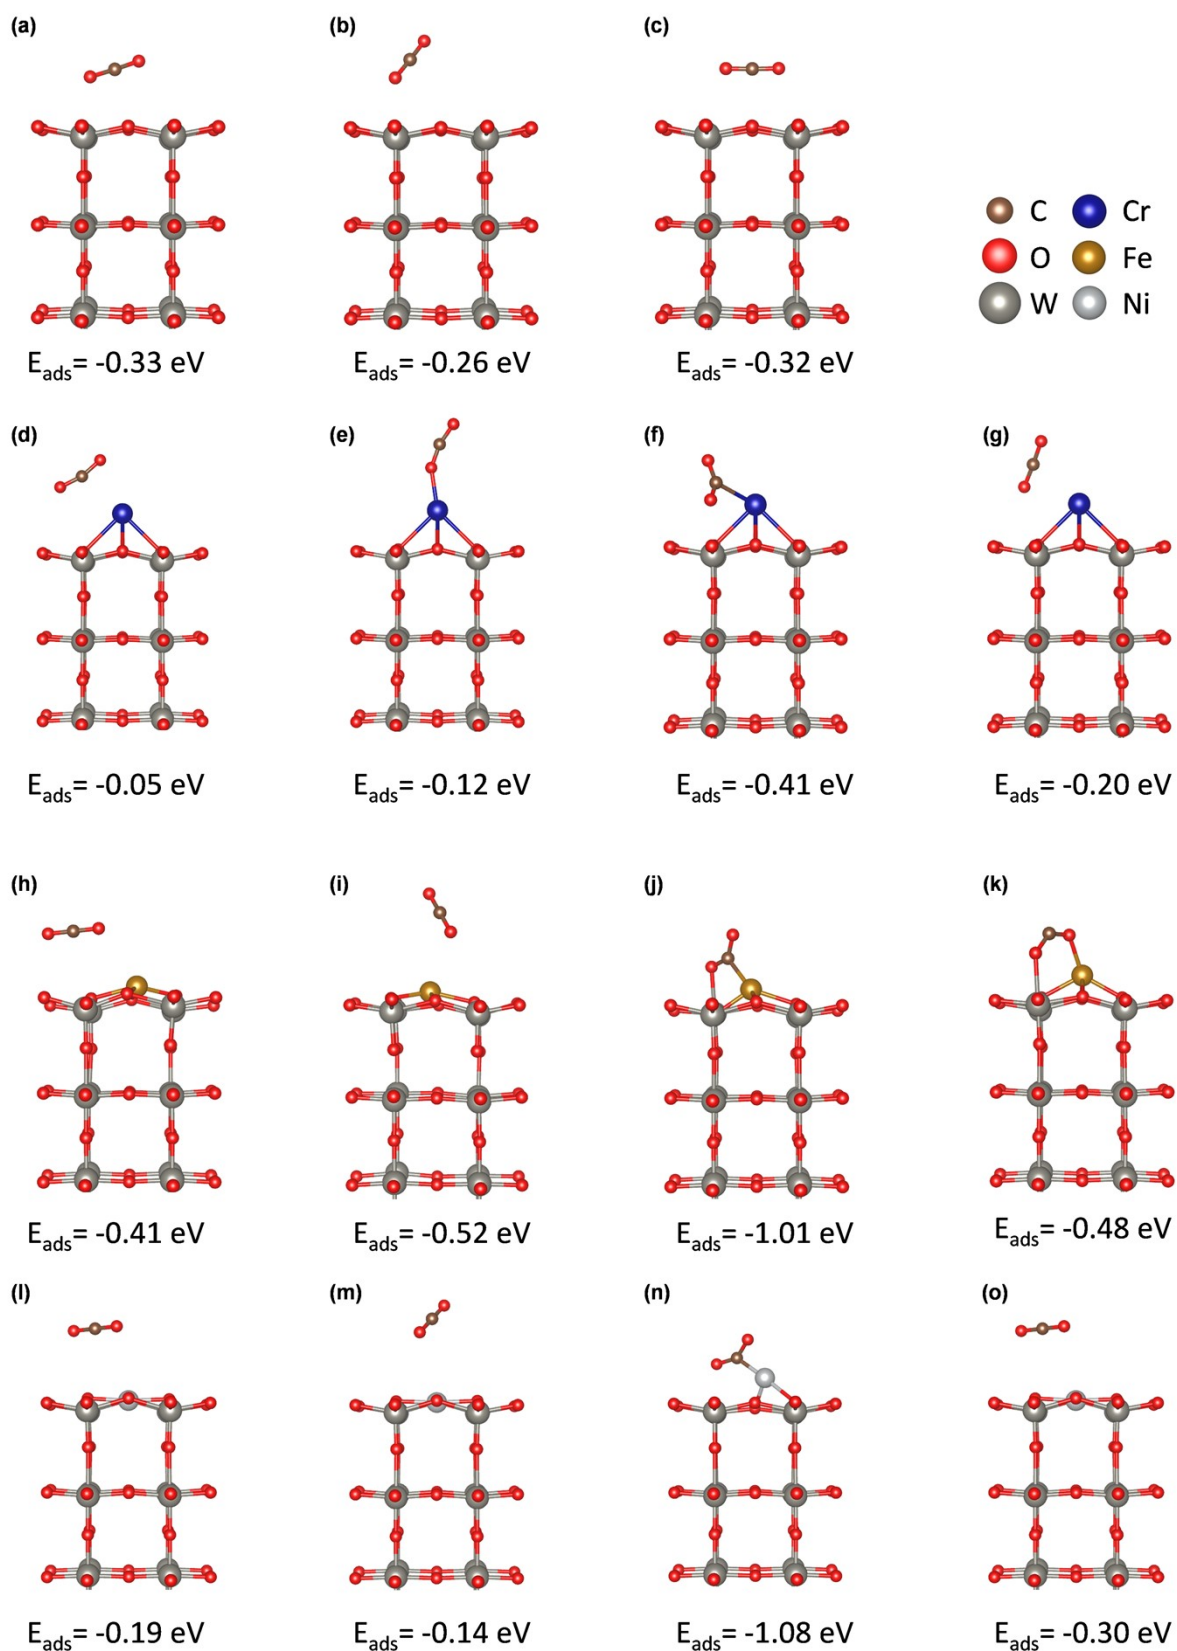

**Fig. S17. CO<sub>2</sub> adsorption models on different WO<sub>3</sub> surfaces.** CO<sub>2</sub> on (a to c) WO<sub>3</sub>, (d to g) SA-Cr-WO<sub>3</sub>, (h to k) SA-Fe-WO<sub>3</sub>, and (l to o) SA-Ni-WO<sub>3</sub>. C, O, W, Cr, Fe and Ni atoms are represented as dark brown, red, dark gray, blue, brown and bone color, respectively

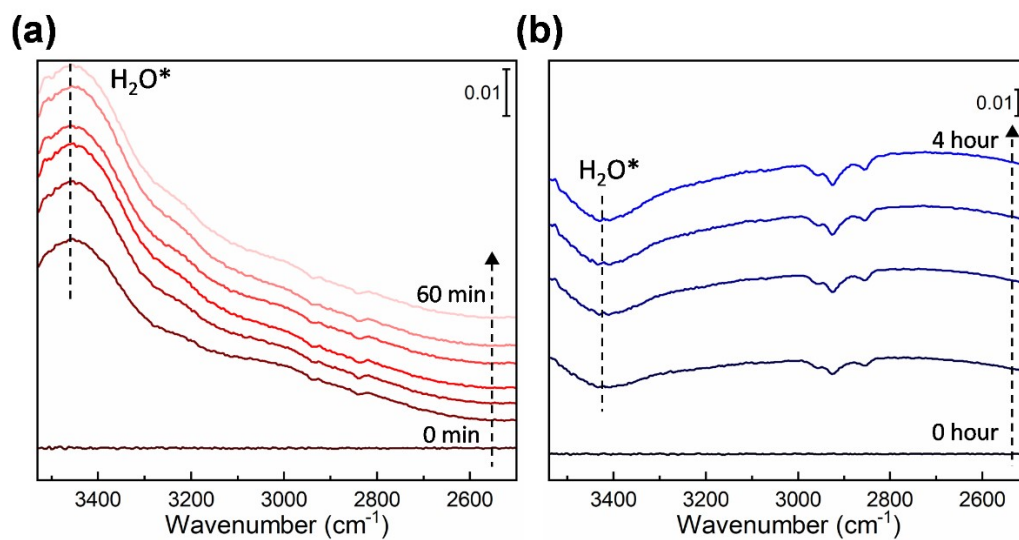

**Fig. S18. In-situ FTIR measurements.** In-situ FTIR spectra of SA-Fe-WO<sub>3</sub> recorded in H<sub>2</sub>O and CO<sub>2</sub> atmospheres under (a) dark conditions and (b) light irradiation.

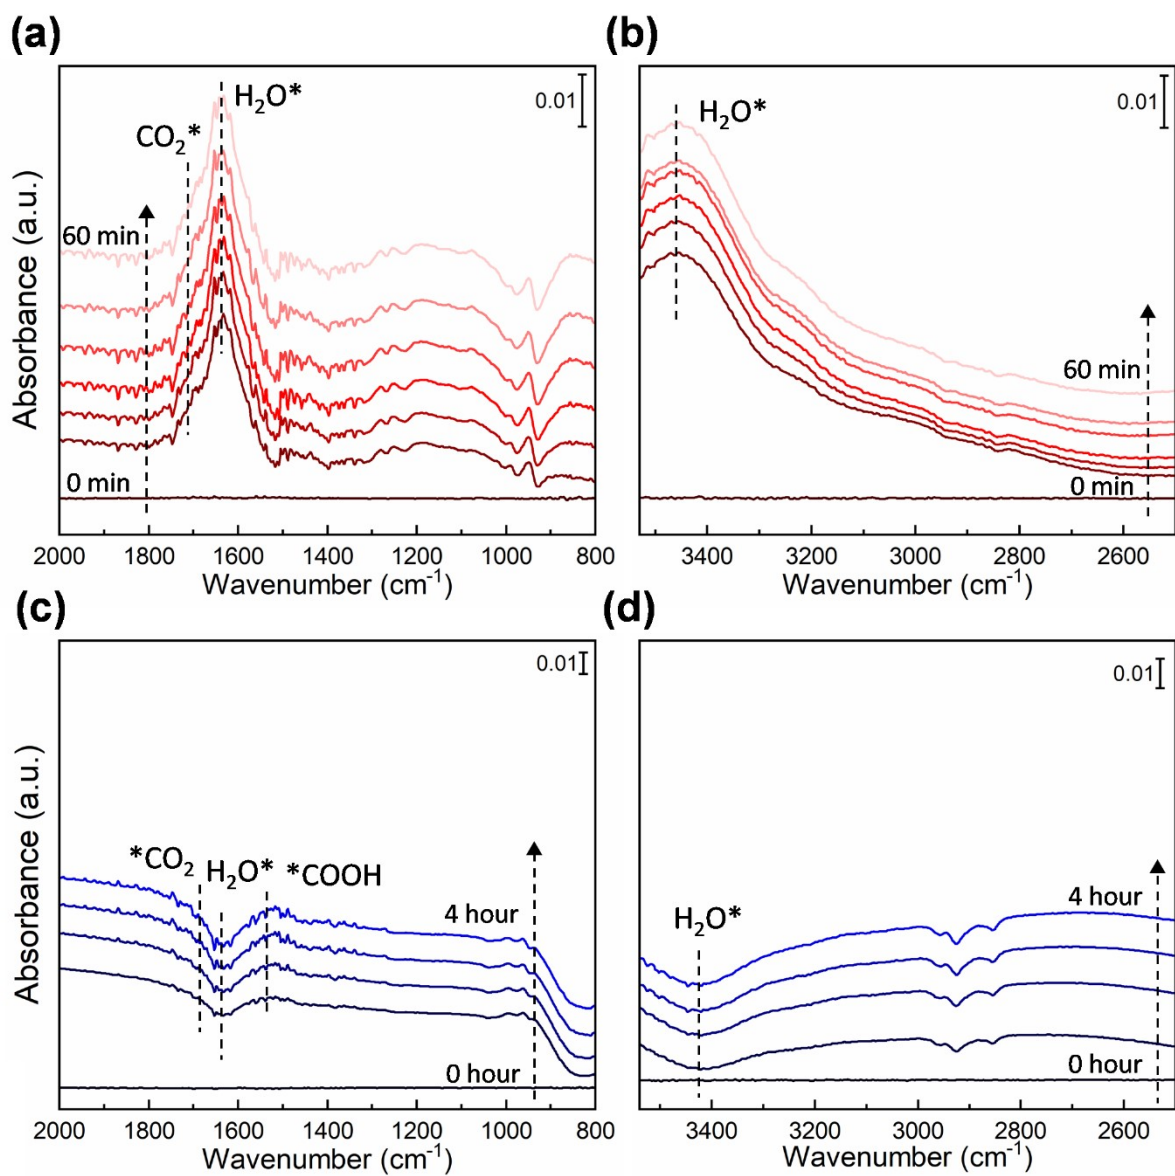

**Fig. S19. In-situ FTIR measurements.** In-situ FTIR spectra of  $\text{WO}_3$  recorded in  $\text{H}_2\text{O}$  and  $\text{CO}_2$  atmospheres under (a, b) dark conditions and (c, d) light irradiation.

**Table S1. Concentration of the loaded metals.** Metal loadings in SA-M-WO<sub>3</sub> (M=Cr, Fe and Ni) measured by ICP-OES. Dopant level was calculated at M/(M+W+O).

| Sample                | W (at%) | Metal (at%) | Dopant level (at%) |
|-----------------------|---------|-------------|--------------------|
| SA-Cr-WO <sub>3</sub> | 96.9    | 3.1         | 0.77               |
| SA-Fe-WO <sub>3</sub> | 96.7    | 3.3         | 0.83               |
| SA-Ni-WO <sub>3</sub> | 96.1    | 3.9         | 0.97               |

**Table S2. Bond length and coordination number.** EXAFS fitting parameters of transition metal anchored WO<sub>3</sub>.

| Sample                | Path | CN (N*S0 <sup>2</sup> ) <sup>a</sup> | R + ΔR(Å) <sup>b</sup> | R factor <sup>c</sup> |
|-----------------------|------|--------------------------------------|------------------------|-----------------------|
| SA-Cr-WO <sub>3</sub> | Cr–O | 3.08                                 | 1.96                   | 0.0222                |
| SA-Fe-WO <sub>3</sub> | Fe–O | 4.27                                 | 1.99                   | 0.0027                |
| SA-Ni-WO <sub>3</sub> | Ni–O | 5.16                                 | 2.04                   | 0.0138                |

<sup>a</sup>Coordination number. <sup>b</sup>Bond distance. <sup>c</sup> Least-squares residual for the EXAFS fitting, where typical values are below 0.02. Smaller residual values indicate better fitting accuracy.

**Table S3. O–to–W ratio before and after metal anchoring.** O–to–W ratios measured by XPS.

| Sample                | O 1s (peak area) | W 4f (peak area) | RSF-corrected<br>O–to–W ratio |
|-----------------------|------------------|------------------|-------------------------------|
| WO <sub>3</sub>       | 924.7            | 1450.6           | 3.2                           |
| SA-Cr-WO <sub>3</sub> | 1031.2           | 661.2            | 3.2                           |
| SA-Fe-WO <sub>3</sub> | 1254.6           | 791.6            | 3.1                           |
| SA-Ni-WO <sub>3</sub> | 1164.9           | 726.9            | 3.1                           |

**Table S4. Bader charge analysis<sup>a</sup>.** Bader charge distribution on W and O atoms.

| Atom                         | WO <sub>3</sub> | SA-Cr-<br>WO <sub>3</sub> | SA-Mn-<br>WO <sub>3</sub> | SA-Fe-<br>WO <sub>3</sub> | SA-Co-<br>WO <sub>3</sub> | SA-Ni-<br>WO <sub>3</sub> |
|------------------------------|-----------------|---------------------------|---------------------------|---------------------------|---------------------------|---------------------------|
| W <sub>1</sub>               | 3.448           | 3.475                     | 3.586                     | 3.584                     | 3.534                     | 3.524                     |
| W <sub>2</sub>               | 3.448           | 3.475                     | 3.586                     | 3.584                     | 3.534                     | 3.524                     |
| W <sub>3</sub>               | 3.448           | 3.475                     | 3.586                     | 3.584                     | 3.535                     | 3.524                     |
| W <sub>4</sub>               | 3.448           | 3.475                     | 3.586                     | 3.584                     | 3.534                     | 3.524                     |
| O <sub>1</sub>               | 6.988           | 7.066                     | 7.140                     | 7.110                     | 7.100                     | 7.080                     |
| O <sub>2</sub>               | 6.988           | 7.066                     | 7.140                     | 7.110                     | 7.100                     | 7.080                     |
| O <sub>3</sub>               | 6.988           | 7.066                     | 7.140                     | 7.110                     | 7.100                     | 7.080                     |
| O <sub>4</sub>               | 6.988           | 7.066                     | 7.140                     | 7.110                     | 7.100                     | 7.080                     |
| M <sub>1</sub><br>(Cr/Fe/Ni) | –               | 5.556                     | 5.787                     | 6.970                     | 8.163                     | 9.272                     |

<sup>a</sup>W<sub>1-4</sub> and O<sub>1-4</sub> represent the tungsten and oxygen atoms surrounding the anchored transition metal. The (Unit: e<sup>-</sup>)

**Table S5. Bader charge analysis of surface atoms upon –OH anchoring.** Calculated Bader charge distribution for W, O and Fe atoms on WO<sub>3</sub> and SA-Fe-WO<sub>3</sub> surface before and after surface hydroxylation.

| Atom           | WO <sub>3</sub> | OH-WO <sub>3</sub> | SA-Fe-WO <sub>3</sub> | SA-Fe-OH-WO <sub>3</sub> |
|----------------|-----------------|--------------------|-----------------------|--------------------------|
| W <sub>1</sub> | 3.448           | 3.400              | 3.584                 | 3.507                    |
| W <sub>2</sub> | 3.448           | 3.332              | 3.584                 | 3.491                    |
| W <sub>3</sub> | 3.448           | 3.392              | 3.584                 | 3.544                    |
| W <sub>4</sub> | 3.448           | 3.395              | 3.584                 | 3.503                    |
| O <sub>1</sub> | 6.988           | 6.967              | 7.110                 | 7.044                    |
| O <sub>2</sub> | 6.988           | 6.988              | 7.110                 | 7.119                    |
| O <sub>3</sub> | 6.988           | 6.963              | 7.110                 | 7.054                    |
| O <sub>4</sub> | 6.988           | 6.990              | 7.110                 | 7.115                    |
| Fe             | –               | –                  | 6.970                 | 6.793                    |

**Table S6. Structural and electronic properties of CO<sub>2</sub> adsorption on different surfaces.** Bond length of C-O<sub>1</sub>, C-O<sub>2</sub>, angle of O-C-O, adsorption energy and Bader charge of CO<sub>2</sub> molecule adsorbed on the different surfaces.

| Sample                            | d <sub>C-O1</sub> | d <sub>C-O2</sub> | ∠ <sub>O-C-O</sub> | E <sub>ads</sub> | Bader charge  e <sup>-</sup> |                |                |                 |
|-----------------------------------|-------------------|-------------------|--------------------|------------------|------------------------------|----------------|----------------|-----------------|
|                                   | (Å)               | (Å)               | (deg.)             | (eV)             | C                            | O <sub>2</sub> | O <sub>1</sub> | CO <sub>2</sub> |
| Free CO <sub>2</sub>              | 1.18              | 1.18              | 180.0              | 0.00             | 1.91                         | 7.05           | 7.05           | 0.00            |
| WO <sub>3</sub>                   | 1.17              | 1.18              | 178.1              | -0.33            | 1.84                         | 7.09           | 7.08           | 0.01            |
| SA-Cr-WO <sub>3</sub>             | 1.24              | 1.21              | 144.4              | -0.41            | 2.37                         | 7.04           | 7.11           | 0.52            |
| SA-Mn-WO <sub>3</sub>             | 1.25              | 1.26              | 140.6              | -1.26            | 2.51                         | 7.07           | 7.13           | 0.71            |
| SA-Fe-WO <sub>3</sub>             | 1.23              | 1.29              | 135.6              | -1.01            | 2.52                         | 7.10           | 7.06           | 0.69            |
| SA-Fe-WO <sub>3</sub><br>(O-down) | 1.25              | 1.26              | 132.1              | -0.48            | 2.41                         | 7.15           | 7.18           | 0.74            |
| SA-Co-WO <sub>3</sub>             | 1.22              | 1.30              | 133.2              | -1.29            | 2.48                         | 7.06           | 7.09           | 0.64            |
| SA-Ni-WO <sub>3</sub>             | 1.25              | 1.24              | 144.3              | -1.08            | 2.43                         | 7.02           | 7.09           | 0.53            |

**Table S7. Impact of –OH on CO<sub>2</sub> adsorption.** Adsorption energy of CO<sub>2</sub> on different surface

| Samples                  | E <sub>ads</sub> (eV) |
|--------------------------|-----------------------|
| WO <sub>3</sub>          | -0.33                 |
| OH-WO <sub>3</sub>       | -0.40                 |
| SA-Fe-WO <sub>3</sub>    | -1.01                 |
| SA-Fe-OH-WO <sub>3</sub> | -0.78                 |

**Table S8. Gibbs free energy calculation.** Calculated Gibbs free energies for the photoreduction of CO<sub>2</sub> to CO over WO<sub>3</sub>, SA-Cr-WO<sub>3</sub>, SA-Fe-WO<sub>3</sub>, and SA-Ni-WO<sub>3</sub>. All units are in eV.

| Sample                | $\Delta G$<br>(*+CO <sub>2</sub> ) | $\Delta G$<br>(*COOH) | $\Delta G$<br>(*CO+H <sub>2</sub> O) | $\Delta G$<br>(*CO) | $\Delta G$<br>(*+CO) |
|-----------------------|------------------------------------|-----------------------|--------------------------------------|---------------------|----------------------|
| WO <sub>3</sub>       | 0                                  | 1.50                  | 0.65                                 | -                   | 0.73                 |
| SA-Cr-WO <sub>3</sub> | 0                                  | -0.55                 | -0.03                                | -0.26               | 0.73                 |
| SA-Fe-WO <sub>3</sub> | 0                                  | -1.73                 | -1.41                                | -1.04               | 0.73                 |
| SA-Ni-WO <sub>3</sub> | 0                                  | -0.47                 | -0.83                                | -1.11               | 0.73                 |

**Table S9. Gibbs free energy corrections for gas-phase species.** Thermodynamic corrections applied to gas molecules used in Gibbs free energy calculations. All units are in eV.

| Species          | E <sub>DFT</sub> | ZPE  | TΔS  | ΔU <sub>(0→T)</sub> | PV   |
|------------------|------------------|------|------|---------------------|------|
| H <sub>2</sub>   | -6.77            | 0.27 | 0.41 | 0.06                | 0.03 |
| CO               | -14.78           | 0.13 | 0.61 | 0.06                | 0.03 |
| CO <sub>2</sub>  | -22.97           | 0.31 | 0.67 | 0.07                | 0.03 |
| H <sub>2</sub> O | -14.23           | 0.57 | 0.59 | 0.08                | 0.03 |

**Table S10. Gibbs free energy corrections for WO<sub>3</sub>.** Thermodynamic corrections applied to adsorbates used in Gibbs free energy calculations. All units are in eV.

| WO <sub>3</sub>     | E <sub>DFT</sub> | ZPE  | TΔS  | ΔH <sub>(0→T)</sub> |
|---------------------|------------------|------|------|---------------------|
| *                   | -555.63          | -    | -    | -                   |
| *CO <sub>2</sub>    | -578.90          | 0.32 | 0.21 | 0.09                |
| *COOH               | -581.47          | 0.79 | 0.19 | 0.10                |
| CO+H <sub>2</sub> O | -585.67          | 0.83 | 0.34 | 0.15                |
| *CO                 | -                | -    | -    | -                   |

**Table S11. Gibbs free energy corrections for SA-Cr-WO<sub>3</sub>.** Thermodynamic corrections applied to adsorbates used in Gibbs free energy calculations. All units are in eV.

| SA-Cr-WO <sub>3</sub> | E <sub>DFT</sub> | ZPE  | TΔS  | ΔH <sub>(0→T)</sub> |
|-----------------------|------------------|------|------|---------------------|
| *                     | -562.02          | -    | -    | -                   |
| *CO <sub>2</sub>      | -585.38          | 0.29 | 0.22 | 0.11                |
| *COOH                 | -589.72          | 0.62 | 0.20 | 0.10                |
| *CO+H <sub>2</sub> O  | -592.68          | 0.78 | 0.35 | 0.16                |
| *CO                   | -578.34          | 0.18 | 0.06 | 0.04                |
| *COH                  | -580.43          | 0.44 | 0.11 | 0.06                |
| *CHO                  | -581.77          | 0.32 | 0.19 | 0.09                |

**Table S12. Gibbs free energy corrections for SA-Fe-WO<sub>3</sub>.** Thermodynamic corrections applied to adsorbates used in Gibbs free energy calculations. All units are in eV.

| SA-Fe-WO <sub>3</sub> | E <sub>DFT</sub> | ZPE  | TΔS  | ΔH <sub>(0→T)</sub> |
|-----------------------|------------------|------|------|---------------------|
| *                     | -561.27          | -    | -    | -                   |
| *CO <sub>2</sub>      | -585.23          | 0.34 | 0.28 | 0.14                |
| *COOH                 | -590.06          | 0.60 | 0.35 | 0.17                |
| *CO+H <sub>2</sub> O  | -593.54          | 1.00 | 0.40 | 0.21                |
| *CO                   | -578.34          | 0.25 | 0.24 | 0.11                |
| *COH                  | -580.30          | 0.45 | 0.17 | 0.07                |
| *CHO                  | -581.68          | 0.42 | 0.16 | 0.07                |

**Table S13. Gibbs free energy corrections for SA-Ni-WO<sub>3</sub>.** Thermodynamic corrections applied to adsorbates used in Gibbs free energy calculations. All units are in eV.

| SA-Ni-WO <sub>3</sub> | E <sub>DFT</sub> | ZPE  | TΔS  | ΔH <sub>(0→T)</sub> |
|-----------------------|------------------|------|------|---------------------|
| *                     | -559.06          | -    | -    | -                   |
| *CO <sub>2</sub>      | -583.08          | 0.37 | 0.25 | 0.13                |
| *COOH                 | -586.73          | 0.69 | 0.26 | 0.13                |
| *CO+H <sub>2</sub> O  | -590.56          | 0.84 | 0.39 | 0.18                |
| *CO                   | -576.18          | 0.25 | 0.26 | 0.12                |
| *COH                  | -577.34          | 0.45 | 0.20 | 0.09                |
| *CHO                  | -578.30          | 0.43 | 0.22 | 0.09                |

**Table S14. Structural and electronic properties of COOH adsorption on different surfaces.** Bond length of C-O, C-OH, angle of O-C-OH, Bader charge of COOH, adsorption energy of CO<sub>2</sub> molecule adsorbed on the different surfaces.

| Sample                | d <sub>C-O</sub><br>(Å) | d <sub>C-OH</sub><br>(Å) | ∠ <sub>O-C-OH</sub><br>(deg.) | E <sub>ads</sub><br>(eV) | Bader<br>charge<br>COOH e |
|-----------------------|-------------------------|--------------------------|-------------------------------|--------------------------|---------------------------|
| WO <sub>3</sub>       | 1.24                    | 1.34                     | 125.25                        | 0.51                     | 0.47                      |
| SA-Cr-WO <sub>3</sub> | 1.21                    | 1.51                     | 115.27                        | -1.35                    | 1.62                      |
| SA-Ni-WO <sub>3</sub> | 1.27                    | 1.35                     | 115.75                        | -1.32                    | 1.49                      |
